# Supplementary material
Source: PubMed Central journal article supplement (PMC6413314)
Supplement: NIHMS985256-supplement-Supporting_Information.pdf [file NIHMS985256-supplement-Supporting_Information.pdf]

## Supplementary Information

### Understanding the Effects of PAMAM Dendrimer Size and Surface Chemistry on Serum Protein Binding with Discrete Molecular Dynamics Simulations

Bo Wang,<sup>1,2,#</sup> Yunxiang Sun,<sup>1,#</sup> Thomas P. Davis,<sup>3</sup> Pu Chun Ke,<sup>3</sup> Yinghao Wu<sup>2</sup> and Feng Ding<sup>1,\*</sup>

<sup>1</sup>Department of Physics and Astronomy, Clemson University, Clemson, SC 29634, USA

<sup>2</sup>Department of Systems and Computational Biology, Albert Einstein College of Medicine, Bronx, NY 10461, USA

<sup>3</sup>ARC Centre of Excellence in Convergent Bio-Nano Science and Technology, Monash Institute of Pharmaceutical Sciences, Monash University, 381 Royal Parade, Parkville, VIC 3052, Australia

#Authors contributed equally

\*Corresponding author: Feng Ding, [fding@clemson.edu](mailto:fding@clemson.edu)

Number of pages: 4

Number of supplementary figures: 4

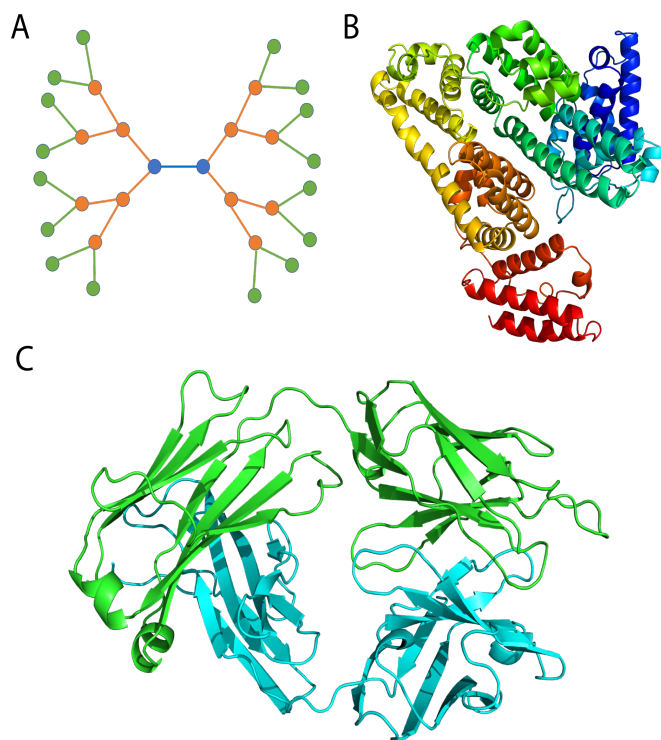

**Figure S1. Molecules used in DMD simulations.** (A) Schematic diagram showing the structure of a PAMAM dendrimer – blue represents the diamine core, orange denotes the branching unites, and the green shows the terminal groups. (B, C) Cartoon structures of human serum albumin (HSA) and immunoglobulin E (IgE), respectively.

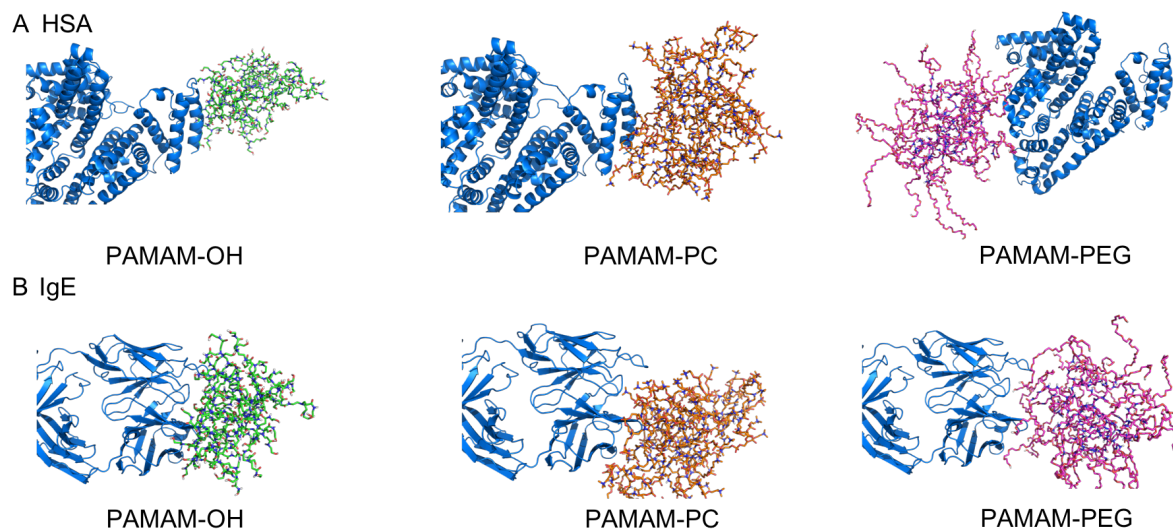

**Figure S2. Snapshots of neutrally charged dendrimers binding with (A) HSA and (B) IgE.**

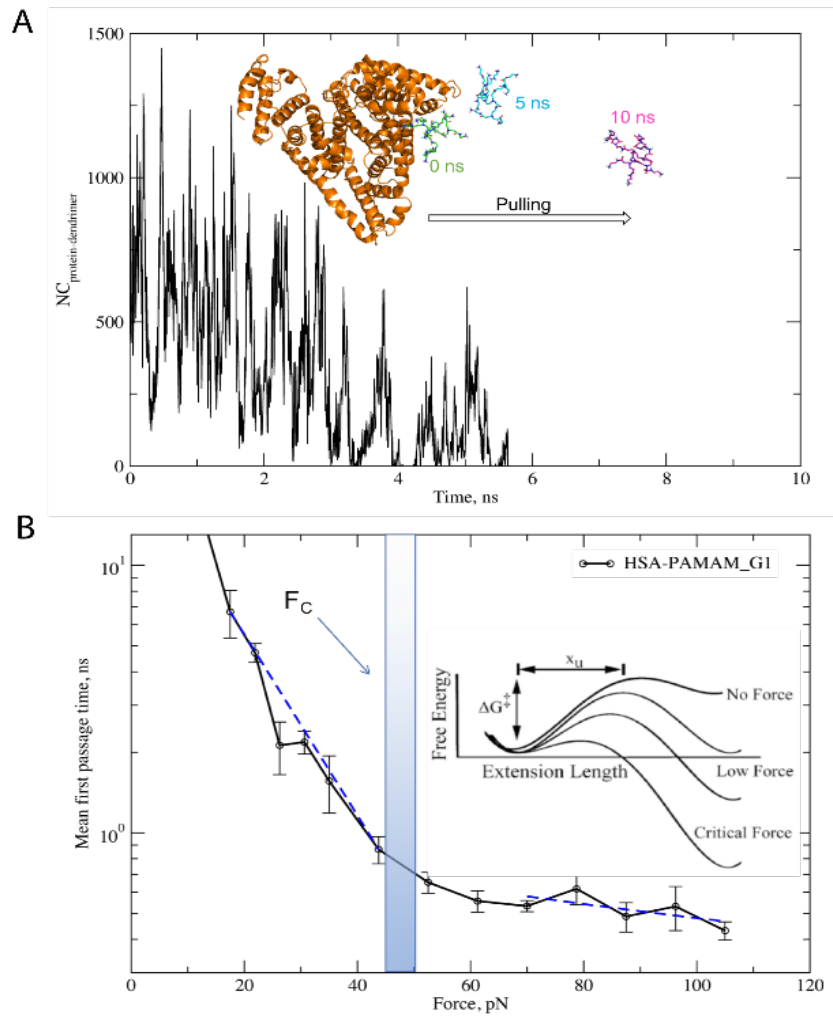

**Figure S3. Pulling simulations with SDMD.** (A) Time evolution of inter-molecular contact numbers between dendrimer and HSA. Snapshots at different times are shown in the inset, where HSA is shown as cartoon and PAMAM-G1 in stick. (B) Schematic illustrating how to estimate the critical force by linear fitting of both the barrier-ed and barrier-less regimes (see Methods).

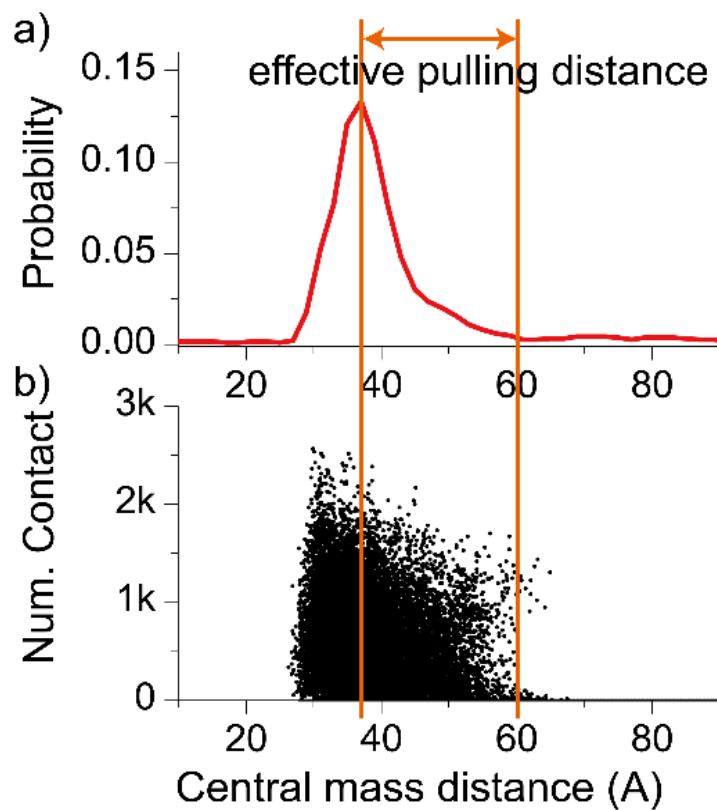

**Figure S4. Estimation of the pulling distance used for calculating the binding free energy.** (a) Histogram of inter-molecular distance from the SDMD simulations. (b) Scatter plot of the inter-molecular contact numbers versus inter-molecular distances. Equilibrium distance,  $d^{eq}$ , was estimated as the first peak, and the dissociation distance,  $d^d$ , was estimated where the number of contacts approached zero (see Methods).
